# Supplementary material for: Prognostic role of pretreatment red blood cell distribution width in patients with cancer: A meta-analysis of 49 studies
Source: PubMed Central journal article supplement (PMC6691718; doi:10.7150/jca.31598), 2019-07-10
Supplement: jcav10p4305s1.pdf [file jcav10p4305s1.pdf]

## Supplementary figure

**Fig.1A**

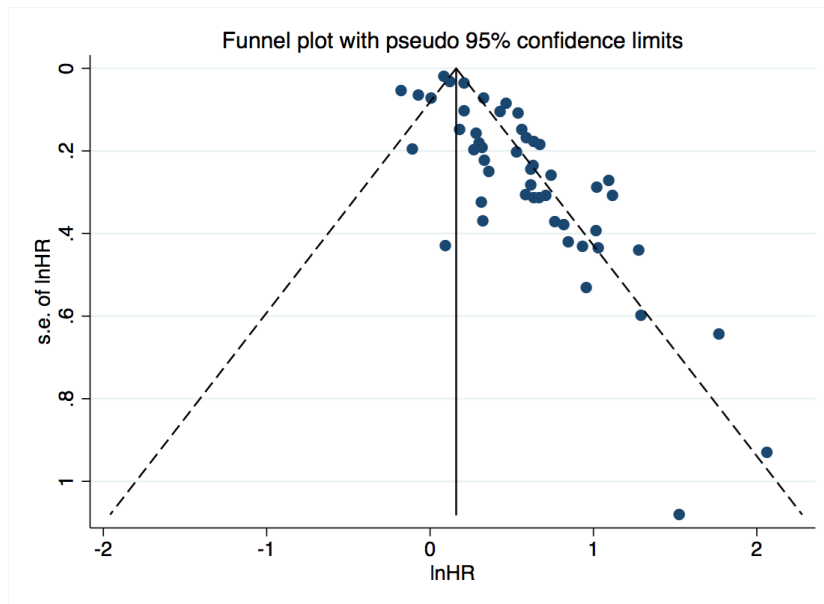

**Fig.1B**

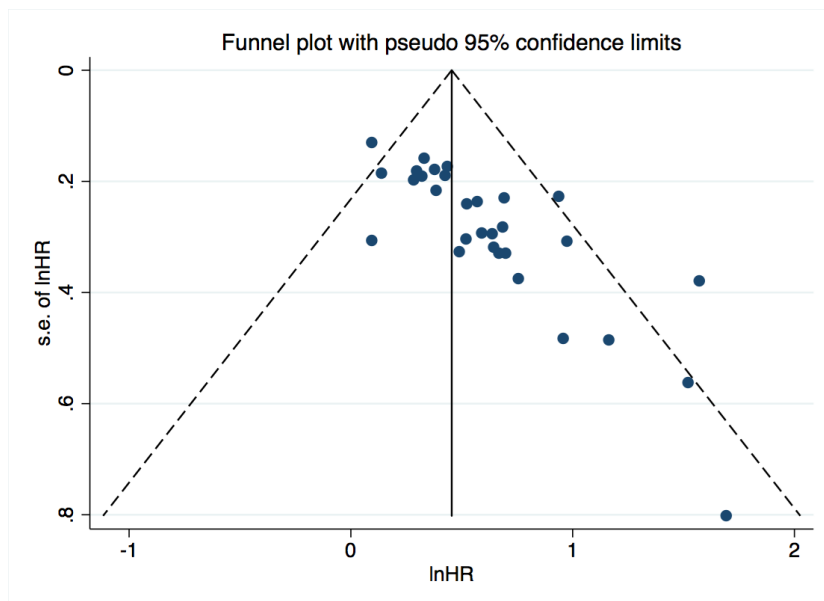

Fig. 1 Publication Bias-Funnel plot for OS set (A) and for DFS/PFS/RFS (B). The funnel plot represents the log HR (on the X axis) against its standard error (on the Y axis) for each individual study (represented by one circle). The vertical line represents the combined effect size, with the diagonal lines representing the expected 95% confidence interval for a given standard error.

**Fig.2A**

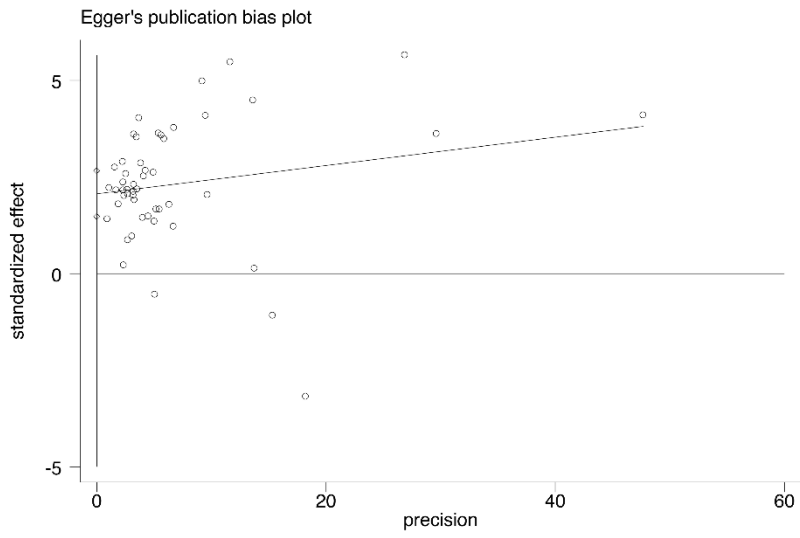

**Fig.2B**

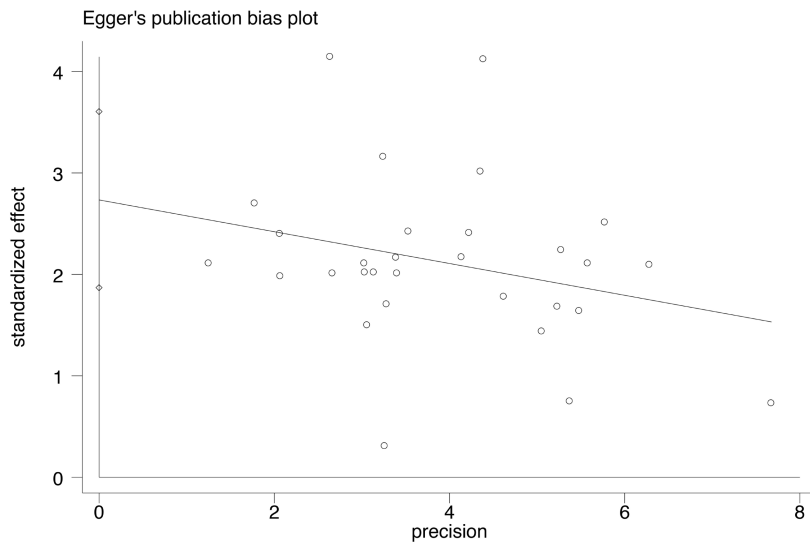

Fig. 2 Publication Bias-Egger's funnel plot for OS set (A) and for DFS/PFS/RFS (B).

**Fig.3A**

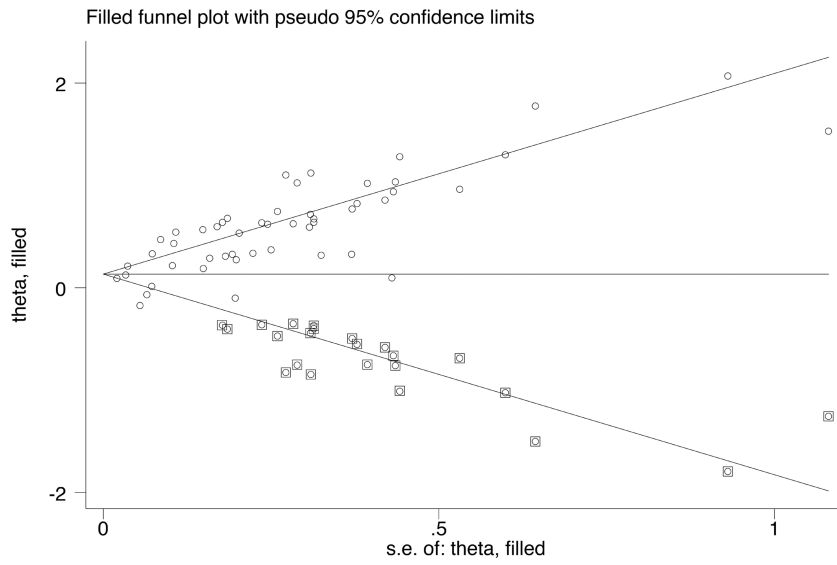

**Fig.3B**

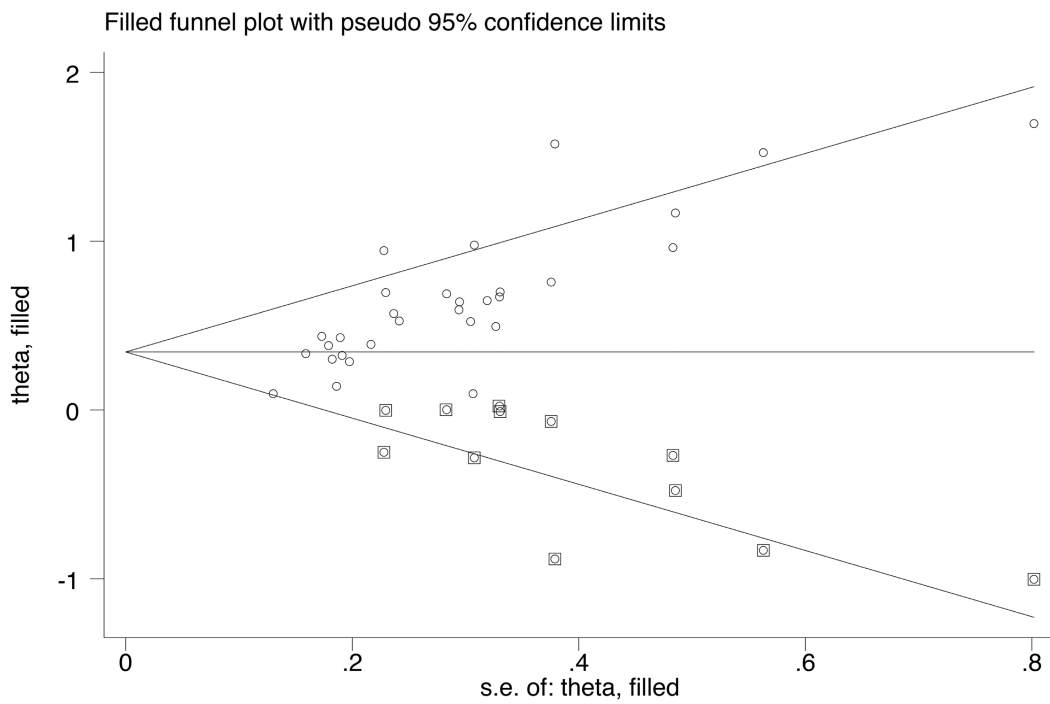

Fig. 3 Adjustment for publication bias among OS set (A) and DFS/PFS/RFS (B) by "Trim and Fill" method.

### Supplementary Table. 1 Search Strategies

Search included: PUBMED, EMBASE: search date was from the inception through April 2018

#### 1) Pubmed search strategy

|                                                      |
|------------------------------------------------------|
| 1. "Neoplasms"[Mesh]                                 |
| 2. cancer [Title/Abstract]                           |
| 3. tumor [Title/Abstract]                            |
| 4. tumour [Title/Abstract]                           |
| 5. carcinoma[Title/Abstract]                         |
| 6. neoplas* [Title/Abstract]                         |
| 7. malignan*[Title/Abstract]                         |
| 8. 1 OR 2 OR 3 OR 4 OR 5 OR 6 OR 7                   |
| 9. "red blood cell distribution width"[MeSH Terms]   |
| 10. "red blood cell distribution width "[All Fields] |
| 11. RDW [All Fields]                                 |
| 12. 9 OR 10 OR 11                                    |
| 13. "Survival"[Mesh]                                 |
| 14. "Mortality"[Mesh]                                |
| 15. "Prognosis"[Mesh]                                |
| 16. Prognos*[Title/Abstract]                         |
| 17. outcome*[Title/Abstract]                         |
| 18. survival[Title/Abstract]                         |
| 19. mortality[Title/Abstract]                        |
| 20. predict*[Title/Abstract]                         |

|                                                              |
|--------------------------------------------------------------|
| 21. 11 OR 12 OR 13 OR 14 OR 15 OR 16 OR 17 OR 18 OR 19 OR 20 |
|--------------------------------------------------------------|

|                     |
|---------------------|
| 22. 8 AND 12 AND 21 |
|---------------------|

## 2) Embase search strategy

|                                               |
|-----------------------------------------------|
| 1. 'neoplasm'/exp                             |
| 2. cancer:ab,ti                               |
| 3. tumor:ab,ti                                |
| 4. tumour:ab,ti                               |
| 5. carcinoma:ab,ti                            |
| 6. neoplas* :ab,ti                            |
| 7. malignan*:ab,ti                            |
| 8. 1 OR 2 OR 3 OR 4 OR 5 OR 6 OR 7            |
| 9. red blood cell distribution width'/exp     |
| 10. red blood cell distribution width         |
| 11. red blood cell distribution width: ab, ti |
| 12. RDW: ab, ti                               |
| 13. 9 OR 10 OR 11 OR 12                       |
| 14. 'prognosis'/exp                           |
| 15. 'survival'/exp                            |
| 16. 'mortality'/exp                           |
| 17. prognos*: ab, ti                          |
| 18. outcome*: ab, ti                          |
| 19. survival: ab, ti                          |
| 20. treatment: ab, ti                         |
| 21. mortality': ab, ti                        |
| 22. recurren*: ab, ti                         |
| 23. predict*: ab, ti                          |

|                                                              |
|--------------------------------------------------------------|
| 24. 14 OR 15 OR 16 OR 17 OR 18 OR 19 OR 20 OR 21 OR 22 OR 23 |
|--------------------------------------------------------------|

|                     |
|---------------------|
| 25. 8 AND 13 AND 24 |
|---------------------|

**Supplementary Table. 2** Subgroup analyses of the associations between RDW and DFS/PFS/RFS in cancer.

| Stratified analyses        | No. of patie | No. of studies | Model  | Pooled HR (95%CI)   | P value | P <sub>D</sub> value | Heterogeneity  |                      |
|----------------------------|--------------|----------------|--------|---------------------|---------|----------------------|----------------|----------------------|
|                            |              |                |        |                     |         |                      | I <sup>2</sup> | P <sub>H</sub> value |
| <b>Tumor type</b>          |              |                |        |                     |         | <0.001               |                |                      |
| Hematologic malignancies   | 1069         | 8              | Fixed  | 2.077 (1.644-2.625) | <0.001  |                      | 9.8%           | 0.354                |
| MM                         | 552          | 4              | Fixed  | 1.891 (1.398-2.556) | 0.001   |                      | 40.0%          | 0.172                |
| DLBCL                      | 242          | 2              | Fixed  | 2.639 (1.585-4.392) | <0.001  |                      | 0.0%           | 0.979                |
| UGI cancer                 | 1293         | 5              | Fixed  | 1.496 (1.232-1.817) | 0.303   |                      | 0.0%           | 0.800                |
| HCC                        | 422          | 2              | Fixed  | 2.104 (1.577-2.807) | <0.001  |                      | 0.0%           | 0.516                |
| NSCLC                      | 1241         | 3              | Random | 1.418 (1.017-1.976) | 0.007   |                      | 63.9%          | 0.063                |
| Colorectal carcinoma       | 753          | 2              | Fixed  | 1.636 (1.211-2.211) | <0.001  |                      | 0.0%           | 0.481                |
| UTUC                       | 420          | 1*             | Fixed  | 1.520 (1.067-2.166) | <0.001  |                      | 0.0%           | 0.789                |
| <b>Stage</b>               |              |                |        |                     |         | <0.001               |                |                      |
| Mix stage                  | 6293         | 23             | Fixed  | 1.594 (1.460-1.740) | <0.001  |                      | 32.6%          | 0.051                |
| Early stage                | 964          | 2              | Random | 2.192 (0.593-8.109) | 0.240   |                      | 67.8%          | 0.078                |
| Advanced Stage             | 54           | 1              | non    | non                 | non     | non                  | non            |                      |
| <b>Age</b>                 |              |                |        |                     |         | <0.001               |                |                      |
| ≤ 60                       | 3685         | 12             | Random | 1.762 (1.427-2.176) | <0.001  |                      | 62.1%          | 0.001                |
| > 60                       | 2552         | 13             | Fixed  | 1.666 (1.439-1.928) | <0.001  |                      | 0.0%           | 0.662                |
| <b>Gender distribution</b> |              |                |        |                     |         | <0.001               |                |                      |
| Female dominant            | 1575         | 6              | Fixed  | 1.856 (1.462-2.355) | <0.001  |                      | 49.6%          | 0.077                |
| Balanced                   | 2505         | 10             | Fixed  | 1.642 (1.419-1.901) | <0.001  |                      | 36.9%          | 0.104                |
| Male dominant              | 2328         | 10             | Fixed  | 1.608 (1.400-1.846) | <0.001  | 0.0%                 | 0.535          |                      |



|                                    |      |    |        |                     |        |        |       |       |
|------------------------------------|------|----|--------|---------------------|--------|--------|-------|-------|
| <b>Country</b>                     |      |    |        |                     |        | <0.001 |       |       |
| Eastern                            | 6586 | 23 | Fixed  | 1.572 (1.437-1.720) | <0.001 |        | 39.9% | 0.018 |
| Western                            | 764  | 3  | Fixed  | 1.606 (1.225-2.104) | <0.001 |        | 0.0%  | 0.513 |
| <b>Cut-off value</b>               |      |    |        |                     |        | <0.001 |       |       |
| > 15%                              | 78   | 1  | non    | non                 | non    |        | non   | non   |
| > 14% and ≤ 15%                    | 2282 | 10 | Fixed  | 1.546 (1.350-1.771) | <0.001 |        | 23.7% | 0.218 |
| > 13% and ≤ 14%                    | 2989 | 9  | Random | 1.818 (1.474-2.243) | <0.001 |        | 54.2% | 0.013 |
| ≤ 13%                              | 1666 | 4  | Fixed  | 1.364 (1.092-1.704) | 0.006  |        | 0.0%  | 0.700 |
| <b>Definition of cut-off value</b> |      |    |        |                     |        | <0.001 |       |       |
| ROC curve analysis                 | 3656 | 12 | Fixed  | 1.770 (1.536-2.040) | <0.001 |        | 46.5% | 0.033 |
| Upper limit                        | 986  | 6  | Fixed  | 1.647 (1.356-2.001) | <0.001 |        | 0.0%  | 0.731 |
| Median                             | 1219 | 2  | Random | 1.515 (0.987-2.326) | 0.057  |        | 68.5% | 0.042 |
| Arbitrary <sup>#</sup>             | 624  | 3  | Fixed  | 1.379 (1.081-1.759) | 0.010  |        | 42.5% | 0.156 |
| <b>HR calculation<sup>‡</sup></b>  |      |    |        |                     |        | <0.001 |       |       |
| Multivariate                       | 4500 | 14 | Fixed  | 1.499 (1.347-1.669) | <0.001 |        | 46.9% | 0.020 |
| Univariate                         | 2850 | 13 | Fixed  | 1.715 (1.490-1.973) | <0.001 |        | 8.2%  | 0.362 |

**Abbreviations:** MM = Multiple Melanomas; DLBCL = Diffuse large B-cell lymphoma; UGI cancer = upper gastrointestinal tract (UGI) cancers (including esophagus cancer, gastric cancer, and small intestine cancer); HCC = hepatocellular carcinoma; NSCLC = non-small cell lung cancer; UTUC = upper tract urothelial carcinoma; OS = overall survival; HR = hazard ratio; CI = confidence interval; P<sub>D</sub> = P for subgroup difference; P<sub>H</sub> = P for heterogeneity.

\*: Cheng et al 2015 separately evaluated the survival outcome in two cohorts, which were derivation cohort and validation cohort.

#: Cut-off value of RDW was based on previous study.

‡: HRs were extracted from multivariate cox proportional hazards models, univariate cox proportional hazards models or survival curve analysis.

**Supplementary Table. 3** Methodological characteristics of included studies and quality score.

| <b>No.</b> | <b>Authors (Ref.)*</b> | <b>Representativeness of population</b> | <b>Non exposed cohort</b> | <b>Ascertainment of exposure</b> | <b>Outcome not present at start of study</b> | <b>Appropriate confounding measurement and account</b> | <b>Sufficient measurement of outcomes</b> | <b>Completeness of follow-up</b> |
|------------|------------------------|-----------------------------------------|---------------------------|----------------------------------|----------------------------------------------|--------------------------------------------------------|-------------------------------------------|----------------------------------|
| 1          | Perlstein et al 2009   | 0                                       | 0                         | 1                                | 1                                            | 1                                                      | 1                                         | 1                                |
| 2          | Koma et al 2013        | 2                                       | 1                         | 1                                | 1                                            | 2                                                      | 1                                         | 1                                |
| 3          | Abakay et al 2014      | 1                                       | 1                         | 1                                | 1                                            | 2                                                      | 1                                         | 1                                |
| 4          | Lee et al 2014         | 2                                       | 1                         | 1                                | 1                                            | 2                                                      | 2                                         | 2                                |
| 5          | Riedl et al 2014       | 1                                       | 1                         | 1                                | 1                                            | 2                                                      | 1                                         | 0                                |
| 6          | Wang et al 2014        | 2                                       | 1                         | 1                                | 1                                            | 2                                                      | 1                                         | 0                                |
| 7          | Warwick et al 2014     | 2                                       | 1                         | 1                                | 1                                            | 2                                                      | 1                                         | 2                                |
| 8          | Yao et al 2014         | 1                                       | 1                         | 1                                | 1                                            | 2                                                      | 1                                         | 2                                |
| 9          | Chen et al 2015        | 1                                       | 1                         | 1                                | 1                                            | 2                                                      | 1                                         | 0                                |
| 10         | Cheng et al 2015       | 2                                       | 1                         | 1                                | 1                                            | 2                                                      | 2                                         | 1                                |
| 11         | Iriyama et al 2015     | 1                                       | 1                         | 1                                | 1                                            | 1                                                      | 2                                         | 2                                |
| 12         | Periša et al 2015      | 2                                       | 1                         | 1                                | 1                                            | 2                                                      | 2                                         | 2                                |
| 13         | Smirne et al 2015      | 2                                       | 1                         | 1                                | 1                                            | 2                                                      | 1                                         | 2                                |
| 14         | Wang et al 2015        | 2                                       | 1                         | 1                                | 1                                            | 2                                                      | 1                                         | 2                                |
| 15         | Xie et al 2015         | 1                                       | 1                         | 1                                | 1                                            | 2                                                      | 1                                         | 1                                |
| 16         | Auezova et al 2016     | 2                                       | 1                         | 1                                | 1                                            | 1                                                      | 1                                         | 0                                |
| 17         | Hirahara et al 2016    | 1                                       | 1                         | 1                                | 1                                            | 2                                                      | 1                                         | 1                                |

|    |                         |   |   |   |   |   |   |   |
|----|-------------------------|---|---|---|---|---|---|---|
| 18 | Huang et al 2016        | 2 | 1 | 1 | 1 | 2 | 2 | 0 |
| 19 | Ichinose et al 2016     | 1 | 1 | 1 | 1 | 2 | 2 | 1 |
| 20 | Kos et al 2016          | 2 | 1 | 1 | 1 | 1 | 1 | 0 |
| 21 | Liang et al 2016        | 1 | 1 | 1 | 1 | 2 | 1 | 0 |
| 22 | Podhorecka et al 2016   | 2 | 1 | 1 | 1 | 1 | 1 | 0 |
| 23 | Sun et al 2016          | 2 | 1 | 1 | 1 | 1 | 1 | 2 |
| 24 | Uysal et al 2016        | 1 | 1 | 1 | 1 | 1 | 2 | 1 |
| 25 | Wan et al 2016          | 2 | 1 | 1 | 1 | 2 | 2 | 2 |
| 26 | Zhang et al 2016        | 2 | 1 | 1 | 1 | 2 | 2 | 2 |
| 27 | Zhao et al 2016         | 1 | 1 | 1 | 1 | 2 | 2 | 0 |
| 28 | Cheng et al 2017        | 1 | 1 | 1 | 1 | 1 | 2 | 0 |
| 29 | Howell et al 2017       | 2 | 1 | 1 | 1 | 2 | 1 | 2 |
| 30 | Hu et al 2017           | 2 | 1 | 1 | 1 | 2 | 1 | 2 |
| 31 | Kara et al 2017         | 1 | 1 | 1 | 1 | 2 | 1 | 2 |
| 32 | Kust et al 2017         | 2 | 1 | 1 | 1 | 2 | 1 | 2 |
| 33 | Li B et al 2017         | 2 | 1 | 1 | 1 | 2 | 1 | 0 |
| 34 | Li Z et al 2017         | 1 | 1 | 1 | 1 | 2 | 1 | 2 |
| 35 | Luo et al 2017          | 2 | 1 | 1 | 1 | 2 | 2 | 2 |
| 36 | Meng et al 2017         | 2 | 1 | 1 | 1 | 1 | 2 | 2 |
| 37 | Sun et al 2017          | 1 | 1 | 1 | 1 | 1 | 1 | 2 |
| 38 | Tangthongkum et al 2017 | 2 | 1 | 1 | 1 | 2 | 2 | 0 |
| 39 | Wang et al 2017         | 2 | 1 | 1 | 1 | 2 | 1 | 2 |
| 40 | Xu et al 2017           | 2 | 1 | 1 | 1 | 1 | 1 | 0 |
| 41 | Yazic et al 2017        | 2 | 1 | 1 | 1 | 2 | 1 | 1 |

|    |                       |   |   |   |   |   |   |   |
|----|-----------------------|---|---|---|---|---|---|---|
| 42 | Zheng et al 2017      | 2 | 1 | 1 | 1 | 1 | 2 | 2 |
| 43 | Zhou et al 2017       | 2 | 1 | 1 | 1 | 2 | 2 | 2 |
| 44 | Zhu et al 2017        | 1 | 1 | 1 | 1 | 2 | 2 | 0 |
| 45 | Życzkowski et al 2017 | 2 | 1 | 1 | 1 | 2 | 1 | 2 |
| 46 | Han et al 2018        | 1 | 1 | 1 | 1 | 2 | 2 | 2 |
| 47 | Ma et al 2018         | 2 | 1 | 1 | 1 | 1 | 2 | 2 |
| 48 | Zhang et al 2018      | 1 | 1 | 1 | 1 | 2 | 2 | 2 |
| 49 | Zhou et al 2018       | 2 | 1 | 1 | 1 | 1 | 2 | 0 |

Adequate assessment included 1) representativeness of population: “source population clearly defined” and “study population described” or “study population represents source population or population of interest”; 2) completeness of follow-up: “completeness of follow-up adequate”; 3) non exposed cohort: Drawn from the same community as the exposed cohort; 4) sufficient measurement of outcomes: “outcome measured appropriately”; 5) appropriate confounding measurement and account: “confounders defined and measured” and “confounding accounted for”; and 6) outcome of interest was not present at start of study

\*References as described in manuscript

**Supplementary Table. 4** Sensitivity analysis using a “one-study removed” model for OS subset.

| Sensitivity analysis      | Heterogeneity test (I <sup>2</sup> ) | Pooled HR (95%CI)   |
|---------------------------|--------------------------------------|---------------------|
| All studies               | 80.0%                                | 1.508 (1.387-1.639) |
| Excluding Wang et al 2015 | 78.6%                                | 1.560 (1.420-1.713) |

**Supplementary Table. 5** Univariate covariate meta-regression analysis for OS subset.

| Stratified factors         | No. of patients | No. of studies | Coefficients (95%CI)   | P value |
|----------------------------|-----------------|----------------|------------------------|---------|
| <b>Tumor type</b>          |                 |                |                        |         |
| MM                         | 748             | 5              | 0.170 (-0.435, 0.776)  | 0.568   |
| DLBCL                      | 881             | 2              | 0.774 (-0.069, 1.617)  | 0.071   |
| UGI cancer                 | 3805            | 6              | -0.257 (-0.766, 0.252) | 0.309   |
| HCC                        | 1510            | 5              | 0.042 (0.468, 0.552)   | 0.867   |
| NSCLC                      | 2304            | 4              | -0.026 (0.570, 0.518)  | 0.923   |
| Breast cancer*             | 2627            | 3              | non                    | non     |
| Colorectal carcinoma       | 843             | 3              | 0.322 (-0.343, 0.987)  | 0.329   |
| Gliomas                    | 287             | 2              | -0.030 (-0.625, 0.685) | 0.926   |
| UTUC                       | 420             | 1              | 0.393 (-0.055, 0.843)  | 0.215   |
| <b>Stage</b>               |                 |                |                        |         |
| Mix stage                  | 16786           | 33             | -0.090 (-0.439, 0.260) | 0.609   |
| Early stage                | 1545            | 5              | 0.103 (-0.509, 0.716)  | 0.736   |
| Advanced Stage*            | 1416            | 6              | non                    | non     |
| <b>Age</b>                 |                 |                |                        |         |
| ≤60*                       | 7979            | 19             | non                    | non     |
| > 60                       | 7992            | 22             | 0.031 (-0.198, 0.260)  | 0.786   |
| <b>Gender distribution</b> |                 |                |                        |         |
| Female dominant*           | 5059            | 9              | non                    | non     |
| Balanced                   | 6418            | 21             | 0.114 (-0.185, 0.413)  | 0.446   |
| Male dominant              | 5325            | 14             | -0.026 (-0.333, 0.279) | 0.860   |
| <b>Country</b>             |                 |                |                        |         |
| Eastern*                   | 10608           | 28             | non                    | non     |
| Western                    | 8180            | 17             | -0.157 (-0.366, 0.052) | 0.138   |
| <b>Cut-off value</b>       |                 |                |                        |         |

|                                    |       |    |                        |       |
|------------------------------------|-------|----|------------------------|-------|
| > 15%                              | 3356  | 6  | -0.020 (-0.427, 0.387) | 0.921 |
| > 14% and ≤ 15%                    | 7911  | 21 | 0.031 (-0.309, 0.371)  | 0.855 |
| > 13% and ≤ 14%                    | 3409  | 11 | 0.189 (-0.183, 0.560)  | 0.311 |
| ≤13%*                              | 1982  | 5  | non                    | non   |
| <b>Definition of cut-off value</b> |       |    |                        |       |
| ROC curve analysis                 | 6276  | 22 | 0.003 (-0.307, 0.300)  | 0.982 |
| Upper limit                        | 3558  | 11 | -0.111 (-0.424, 0.202) | 0.478 |
| Median                             | 2357  | 3  | -0.204 (-0.615, 0.207) | 0.323 |
| 4th quartile*                      | 2757  | 3  | non                    | non   |
| Arbitrary                          | 922   | 5  | -0.139 (-0.558, 0.281) | 0.509 |
| <b>HR calculation</b>              |       |    |                        |       |
| Multivariate*                      | 13572 | 28 | non                    | non   |
| Univariate                         | 4275  | 17 | 0.037 (-0.193, 0.268)  | 0.748 |

\*: This variable was left out of the metareg command in STATA version 14.0 (STATA, College Station, TX). The effect size associated with this variable is labeled `_cons` in the primary output.

**Supplementary Table. 6** Publication bias assessment with different tests for OS and DFS/PFS/RFS.

| Publication bias   | Begg's<br><i>P</i> value | Egger's<br><i>P</i> value | T&F(Fill) method analysis |                     | Model  |
|--------------------|--------------------------|---------------------------|---------------------------|---------------------|--------|
|                    |                          |                           | Before                    | After               |        |
| OS subset          | 0.116                    | <0.001                    | 1.508 (1.387-1.639)       | 1.230 (1.132-1.335) | Random |
| DFS/PFS/RFS subset | <0.001                   | <0.001                    | 1.576 (1.447-1.716)       | 1.410 (1.305-1.524) | Fixed  |

Abbreviations: CI= confidence interval; Fill=number of studies added by trim and fill method; het= heterogeneity; HR=hazard ratio; T&F=result of trimmed and filled analysis, using assumption of random effects.
